# Supplementary material for: A dual-emission ratiometric fluorescence probe for highly selective and simultaneous detection of tetracycline and ferric ions in environmental water samples based on a boron-doped carbon quantum dot/CdTe–Eu3+ composite
Source: Royal Society of Chemistry journal article supplement (doi:10.1039/d2en00110a), 2022-01-01
Supplement: d2en00110a1.pdf [file d2en00110a1.pdf]

## Supporting Information

### **A Dual-Emission Ratiometric Fluorescence Probe for Highly Selective and Simultaneous Detection of Tetracycline and Ferric ions in Environmental Water Samples Based on the Boron-Doped Carbon Quantum Dots/CdTe-Eu<sup>3+</sup> Composite**

Mengqi Huang, Changlun Tong\*

Key Laboratory of Environmental Remediation and Ecological Health, Ministry of Education, College of Environmental and Resource Sciences, Zhejiang University, Hangzhou 310058, China

Corresponding author. E-mail: [cltong@zju.edu.cn](mailto:cltong@zju.edu.cn).

#### **Table of contents**

|                                                                                                                                                                   |     |
|-------------------------------------------------------------------------------------------------------------------------------------------------------------------|-----|
| 1. Figure S1 UV-vis absorption spectra of B-CQDs and B-CQDs-Fe <sup>3+</sup> and fluorescence spectra of B-CQDs in the presence of Fe <sup>3+</sup> and EDTA..... | S-2 |
| 2. Figure S2 Optimization of the detection conditions—composition ratios, concentration of B-CQDs, and excitation spectra... ..                                   | S-3 |
| 3. Figure S3 Optimization of the detection conditions—pH and equilibrium time.....                                                                                | S-4 |
| 4. Table S1 Comparison of the proposed method with reported analytical methods for TC detection.....                                                              | S-5 |

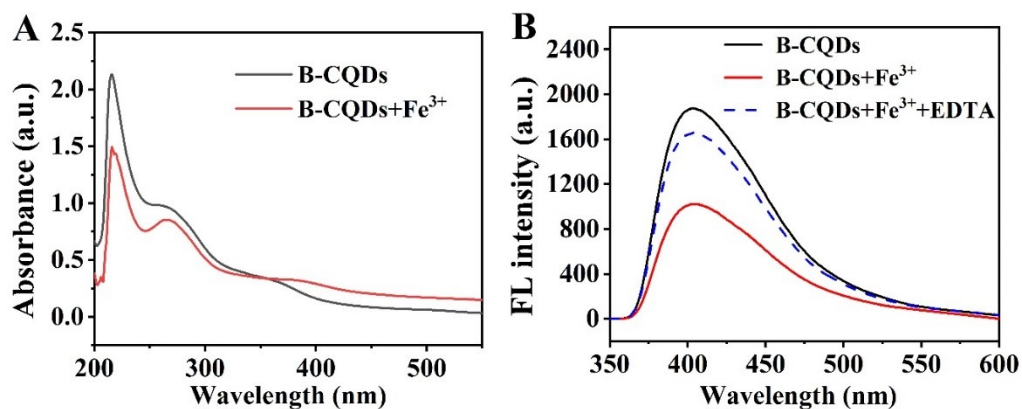

**Figure S1.** (A) UV-vis absorption spectra of B-CQDs and B-CQDs +Fe<sup>3+</sup>, conditions: B-CQDs: 50.0 mg/L, Fe<sup>3+</sup>: 15.0  $\mu$ M, Tirs-HCl buffer: 25 mM, pH=8.0. (B) Fluorescence spectra of B-CQDs in the presence of Fe<sup>3+</sup> and EDTA, conditions: B-CQDs: 6.0 mg/L, Fe<sup>3+</sup>: 15.0  $\mu$ M, EDTA: 20.0  $\mu$ M, Tirs-HCl buffer: 25 mM, pH=8.0,  $\lambda_{\text{ex}}$ =270 nm.

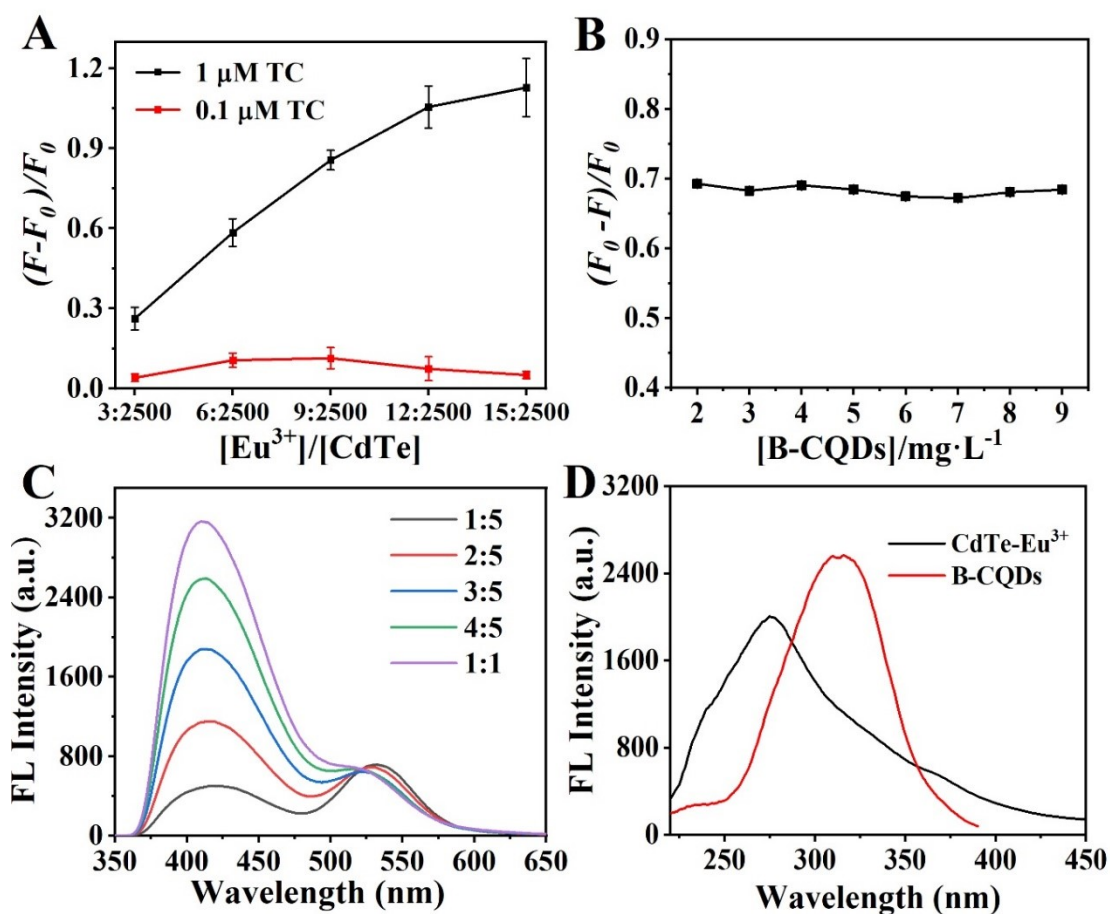

**Figure S2.** (A) Effect of the composition ratios of  $\text{Eu}^{3+}/\text{CdTe}$  on fluorescence recover efficiency of the  $\text{CdTe-Eu}^{3+}$  system in the presence of TC; (B) Effect of the concentrations of B-CQDs on the fluorescence quenching efficiency of B-CQDs caused by  $\text{Fe}^{3+}$ ; (C) Effect of the composition ratios of B-CQDs/ $\text{CdTe-Eu}^{3+}$  on the fluorescence intensity of the B-CQDs/ $\text{CdTe-Eu}^{3+}$  probe; (D) Excitation spectra of B-CQDs and  $\text{CdTe-Eu}^{3+}$ .

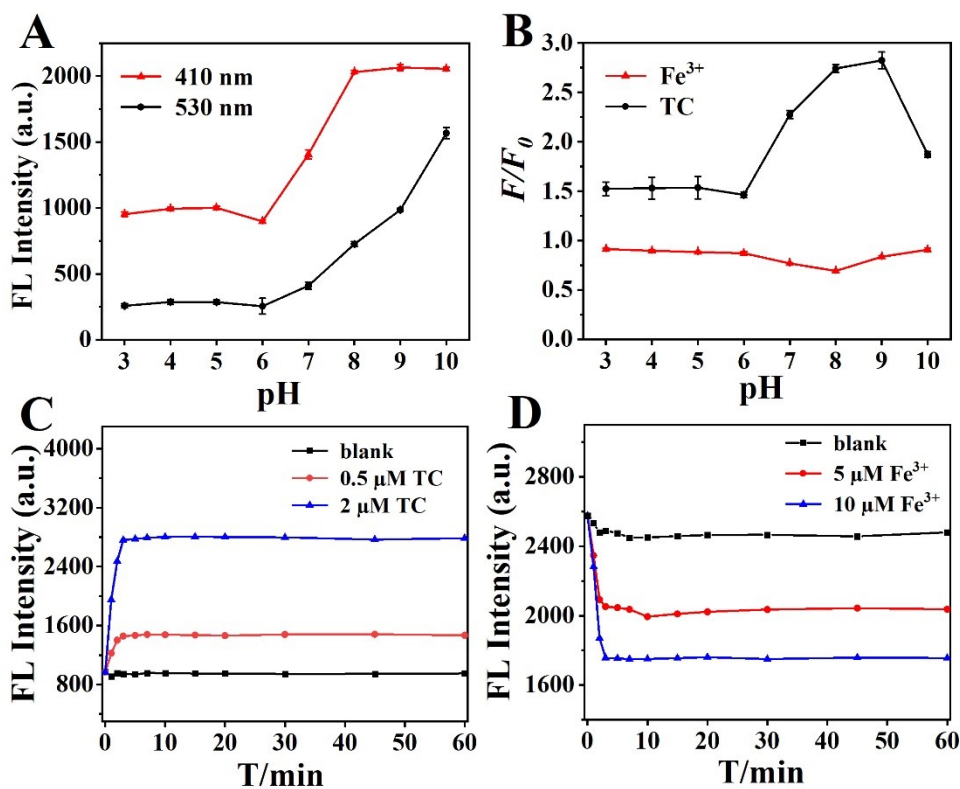

**Figure S3.** (A) Effect of pH on the fluorescence intensities of the B-CQDs/CdTe-Eu<sup>3+</sup> probe; (B) Effect of pH on the fluorescence intensity ratio of  $F/F_0$  caused by TC and Fe<sup>3+</sup>; (C) Effect of equilibrium time on the fluorescence intensities of CdTe-Eu<sup>3+</sup> in the presence of TC; (D) Effect of equilibrium time on the fluorescence intensities of B-CQDs in the presence of Fe<sup>3+</sup>. Conditions: B-CQDs: 6.0 mg/L, CdTe-Eu<sup>3+</sup>: 10.0 mg/L, TC: 2.0  $\mu$ M, Fe<sup>3+</sup>: 15.0  $\mu$ M, Tris-HCl buffer: 25 mM,  $\lambda_{ex}$ =270 nm.

**Table S1.** Comparison of the proposed method with reported analytical methods for TC detection

| Methods         | Materials                    | Linear range<br>( $\mu\text{M}$ ) | LOD<br>( $\mu\text{M}$ ) | References |
|-----------------|------------------------------|-----------------------------------|--------------------------|------------|
| Fluorometric    | F,N-GQDs                     | 2-30                              | 0.077                    | [S1]       |
| Fluorometric    | P-CDs                        | 0.02-0.8                          | 0.012                    | [S2]       |
| Fluorometric    | N,S-CDs                      | 0.369-73.7                        | 0.148                    | [S3]       |
| Fluorometric    | Luminol-Eu-Cit               | 0.5-80                            | 0.039                    | [S4]       |
| Fluorometric    | QDs-MIP                      | 0.5-15                            | 0.14                     | [S5]       |
| Colorimetric    | CNNPs                        | 0.8-400                           | 0.12                     | [S6]       |
| Colorimetric    | MIP-PC                       | 0.01-0.15                         | 0.002                    | [S7]       |
| Electrochemical | CB-PS/GCE                    | 5-120                             | 1.15                     | [S8]       |
| Electrochemical | aptasensor                   | 22.4-6750                         | 22.4                     | [S9]       |
| Fluorometric    | B-CQDs/CdTe-Eu <sup>3+</sup> | 0.01-2.0                          | 0.0042                   | This work  |

## References

- [S1] C.X. Wang, D. Chen, Y. S. Yang, S. Y. Tang, X. M. Li, F. Xie, G. Wang and Q. L. Guo, Synthesis of multi-color fluorine and nitrogen co-doped graphene quantum dots for use in tetracycline detection, colorful solid fluorescent ink, and film, *J. Colloid Interface Sci.*, 2021, **602**, 689-698.

- [S2] C. S. Lu, Q. Su and X. M. Yang, Ultra-long room-temperature phosphorescent carbon dots: pH sensing and dual-channel detection of tetracyclines, *Nanoscale*, 2019, **11**, 16036-16042.
- [S3] N. Zhao, Y. Wang, S. S. Hou and L. S. Zhao, Functionalized carbon quantum dots as fluorescent nanoprobe for determination of tetracyclines and cell imaging, *Microchim. Acta*, 2020, **187**, 351.
- [S4] R. H. Yao, Z. J. Li, G. Liu, C. B. Fan and S. Z. Pu, Luminol-Eu-based ratiometric fluorescence probe for highly selective and visual determination of tetracycline, *Talanta*, 2021, **234**, 122612.
- [S5] Y. Q. Yang, H. Niu and H. Q. Zhang, Direct and highly selective drug optosensing in real, undiluted biological samples with quantum-dot-labeled hydrophilic molecularly imprinted polymer microparticles, *ACS Appl. Mater. Interfaces*, 2016, **8**, 15741-15749.
- [S6] B. T. Huy, N. N. Nghia and Y. Lee, Highly sensitive colorimetric paper-based analytical device for the determination of tetracycline using green fluorescent carbon nitride nanoparticles, *Microchem. J.*, 2020, **158**, 105151.
- [S7] J. Hou, H. C. Zhang, Q. Yang, M. Z. Li, L. Jiang and Y. L. Song, Hydrophilic-hydrophobic patterned molecularly imprinted photonic crystal sensors for high-sensitive colorimetric detection of tetracycline, *Small*, 2015, **11**, 2738-2742.
- [S8] K. P. Delgado, P. A. Raymundo-Pereira, A. M. Campos, O. N. Oliveira Jr. and B. C. Janegitz, Ultralow cost electrochemical sensor made of potato starch and carbon

black nanoballs to detect tetracycline in waters and milk, *Electroanalysis*, 2018, **30**, 2153-2159.

[S9] T. H. Le, V. P. Pham, T. H. La, T. B. Phan and Q. H. Le, Electrochemical aptasensor for detecting tetracycline in milk, *Adv. Nat. Sci: Nanosci. Nanotechnol.*, 2016, **7**, 15008.
